# Supplementary material
Source: Research Square preprint supplement (doi:10.21203/rs.3.rs-8754789/v1)
Supplement: Supplementary file 1 [file 4cd0125ddce2a05cc48ed416.docx]

Supplementary Materials for

**GPR162 Attenuates Obesity-Induced Lung Adenocarcinoma Progression via Dual Modulation of Fatty Acid Oxidation and Cuproptosis**

Yao Long2,3, Wei Wang5,6, Can Cao2,3, Molly S. C. Li7, Lili Li7, Shuang Liu2,4 #, Desheng Xiao2,3 #, Yongguang Tao1,2,3,6 #

1. Hunan Key Laboratory of Cancer Metabolism, Hunan Cancer Hospital and The Affiliated Cancer Hospital of Xiangya School of Medicine, Central South University, Changsha, Hunan, 410031 China
2. Cancer Research Institute; School of Basic Medicine, Central South University, Changsha, Hunan, 410078 China
3. Department of Pathology, Xiangya Hospital, Central South University, Changsha, Hunan, 410008 China
4. Department of Oncology, Institute of Medical Sciences, National Clinical Research Center for Geriatric Disorders, Xiangya Hospital, Central South University, 410008 Changsha, Hunan, China
5. Department of Thoracic Surgery, Second Xiangya Hospital, Central South University, Changsha 410011, China
6. Hunan Key Laboratory of Early Diagnosis and Precise Treatment of Lung Cancer, Second Xiangya Hospital, Central South University, Changsha 410011, China
7. State Key Laboratory of Translational Oncology, Sir YK Pao Center for Cancer, Department of Clinical Oncology, The Chinese University of Hong Kong, Hong Kong, China

# Corresponding author:

Yongguang Tao. Email: taoyong@csu.edu.cn; Y.T. Key Laboratory of Carcinogenesis and Cancer Invasion, Ministry of Education, Xiangya Hospital, Central South University, Hunan, 410078 China. ORCID ID: 0000-0003-2354-5321. Tel. +(86) 731-84805448; Fax. +(86) 731-84470589.

Shuang Liu. Email: shuangliu2016@csu.edu.cn. Xiangya Hospital, Central South University.

Desheng Xiao. Email: [xdsh96@csu.edu.cn](mailto:xdsh96@csu.edu.cn) Xiangya Hospital, Central South University.

**Disclosure of Potential Conflicts of Interest**

The authors have declared that no conflict of interest exists.

**This PDF file includes:**

Figures. S1 to S11

Tables S1 to S4

**Suplemental Figure and Suplemental Figure legends**

**Fig.S1 GPR162 acts as a protective factor inhibits the development of lung adenocarcinoma in HFD-induced obese mice.**

A. Strategies for establishing xenograft tumor models in high-fat diet obese mice. B-E. To verify the successful construction of high-fat diet-induced obese mice, we collected blood from the orbital vein of two groups (normal and obese) mice for biochemical detection of the levels of triglycerides(B), cholesterol(C), high-density lipoprotein(D), and low-density lipoprotein(E) in serum and plasma. F-H. To investigate the capacity of LLC cells with stable GPR162 overexpression to develop tumors (n = 10 mice per group), a tumor growth xenograft model was established. Tumor formation was tracked at the tumor volume(F), image(G) and weight(H). I-J. To investigate the capacity to develop tumors of LLC cells with stable GPR162 overexpression in high-fat diet obese mice(n = 10 mice per group), a tumor growth xenograft model was established. Tumor formation was tracked at the image(I), and weight(J).

**Fig.S2 GPR162 promotes cuproptosis**

A. GPR162 expression levels were determined by western-blot analysis in mitochondria and cytosolic fractions generated from A549 cells following GPR162 overexpression. B. GPR162 expression levels were determined by western-blot analysis in mitochondria and cytosolic fractions generated from H1299 cells following GPR162 knockdown. C. GPR162 expression levels were determined by western-blot analysis in mitochondria and cytosolic fractions generated from PC9 cells following GPR162 overexpression. D. Confocal microscopy images of H358 cells stained with Mitotracker, anti-SLC25A3, and DAPI. E-F. Confocal microscopy images of H358(D) and H1975(E) cells stained with Mitotracker, anti-DLAT, and DAPI. G-I. The half-maximal drug inhibitory concentration (IC50) analysis of elesclomol-Cu responsiveness in PC9 (G), H1299 (H), and A549 (I) cells.

**Fig.S3 GPR162 does not affect apoptosis.**

A-B. Mitochondrial membrane potential assay kit analysis of JC-1 in H1299 and LLC cells overexpression GPR162. C-D. Mitochondrial ATP assay kit analysis of ATP in H1299 and LLC cells overexpression GPR162. E-H. Annexin V-APC/7-AAD apoptosis kit analysis of apoptosis in A549 (E-F) and PC9 (G-H) cells following GPR162 overexpression.

**Fig.S4 GPR162 was significantly enriched in immune-related pathways and associated with macrophages.**

A. KEGG pathway enrichment analysis was performed on the proteins that interacted with GPR162 in A549 cells. B. GOBP pathway enrichment analysis of LLC cells with stable overexpression GPR162 xenograft tumor tissues. C. GSEA of the whole transcriptome data in GPR162 overexpression cells were enriched in Response to interferon-gamma, and Positive regulation of acute inflammatory response. D-E. TIMER analysis of the relationship between GPR162 and immunity infiltration in LUAD and LUSC.

**Fig.S5 GPR162 was significantly enriched in immune-related pathways and associated with macrophages.**

A. Heatmap of the differentially expressed genes of LLC cells with stable overexpression GPR162 xenograft tumor tissues via RNA-seq. B. KEGG pathway enrichment analysis of LLC cells with stable overexpression GPR162 xenograft tumor tissues. C. TIMER analysis of the expression of GPR162 in each immune cell. D. SC-Seq analysis of the expression of GPR162 in each immune cell.

**Fig.S6 Flow cytometry analysis of the infiltration of each immune cell in the xenograft tumor tissues of obese mice overexpressing GPR162.**

A-F. Flow cytometry analysis of NK(A), NKT(B), CD8+T cells(C), CD4+T cells(D), Macrophages(E), and DC(F) cell infiltration in the spleen tissues. G-L. Flow cytometry analysis of NK(G), NKT(H), CD4+T cells(I), Monocytes(J), Granulocytes(K), and DC(L) cell infiltration in the tumor tissues.

**Fig.S7 Extraction of mice bone marrow-derived macrophages and differentiation in vitro.**

A. Primary mice bone marrow-derived macrophages were treated with LPS and IL4+IL13. B-H. qPCR analysis of CD86(B), IL12(C), IL6(D), IL1β(E), CD206(F), ARG1(FG, and IL10(H) in bone marrow-derived macrophages after treatment with LPS and IL4+IL13.

**Fig.S8 GPR162 accelerated the polarization of macrophages to M1.**

A. Flow cytometry analysis of neutrophil cell infiltration in the spleen and tumor tissues. B. Jurkat T cells were cocultured with PC9 cells in the lower chambers of a 5-μm Transwell plate. C-F. qPCR analysis of CCL2 (C), GZMB (D), TNFα (E), and TGFβ (F) in PC9 cells overexpression GPR162 after co-culture with Jurkat T cells. G. Mouse bone marrow-derived macrophages were co-cultured with LLC cells-TCM overexpression GPR162 and then cocultured with CD8+T cells in the upper chambers of a 5-μm Transwell plate. H-K. qPCR analysis of CCL2 (H), GZMB (I), TNFα (J), and TGFβ (K) in LLC cells overexpression GPR162 after co-culture with BMDM and CD8+ T cells.

**Fig.S9 GPR162 accelerated the polarization of macrophages to M1.**

A-C. qPCR analysis of NOS2 (A) IL10 (B), and IL13 (C) in BMDM after co-culture with LLC cells with stable overexpression GPR162. D-H. qPCR analysis of NOS2 (D), IL1β (E), CD163 (F), IL4 (G), and IL13 (H) in BMDM after co-culture with LLC cells with stable overexpression GPR162. I. Flow cytometry analysis of macrophage infiltration in BMDM after co-culture with LLC cells with stable overexpression GPR162. J. Percentage CD45+ within FCD206+ and CD86-gated live cells from BMDM after co-culture with LLC cells with stable overexpression GPR162. K. Flow cytometry analysis of macrophage infiltration in BMDM after co-culture with LLC cells with stable overexpression GPR162.

**Table 1. Human RT-qPCR primers used for detection of the mRNA level**

| **Name** | **Sequence** | **Product**  **Size(bp)** | |
| --- | --- | --- | --- |
| GPR162 | F: CTCCTTCATCTGGTCCTGCGAG  R: TGGCTCCGTTAGCATCAAAGCG | 161 | |
| β-actin | F: CACCATTGGCAATGAGCGGTTC  R: AGGTCTTTGCGGATGTCCACGT | 135 | |
| SLC25A3 | F: CTGGCTCCTATGGAAGCTGCTA  R: GTCTCATCCAGAGAGGAGCAAC | 142 | |
| FASN | F: TTCTACGGCTCCACGCTCTTCC  R: GAAGAGTCTTCGTCAGCCAGGA | 131 | |
| SCD1 | F: CCTGGTTTCACTTGGAGCTGTG  R: TGTGGTGAAGTTGATGTGCCAGC | 106 | |
| DGAT1 | F: GCTTCAGCAACTACCGTGGCAT  R: CCTTCAGGAACAGAGAAACCACC | 138 | |
| CPT1A | F: GATCCTGGACAATACCTCGGAG  R: CTCCACAGCATCAAGAGACTGC | 142 | |
| CPT1B | F: TGTATCGCCGTAAACTGGACCG  R: TGTCTGAGAGGTGCTGTAGCAC | 147 | |
| LIPE | F: AGCCTTCTGGAACATCACCGAG  R: TCGGCAGTCAGTGGCATCTCAA | 126 | |
| ABHD5 | F: CAGCATCCAGTCCTTACGACCA  R: GTTCAGTCCACAGTGTCGCAGA | 135 | |
| ACC | F: TTCACTCCACCTTGTCAGCGGA  R: GTCAGAGAAGCAGCCCATCACT | 99 | |
| LPL | F: CTGCTGGCATTGCAGGAAGTCT  R: CATCAGGAGAAAGACGACTCGG | 114 | |
| ATP7B | F: GGACCACAACATCATTCCAGGAC  R: ATGAGCACGTCCATGTTGGCTG | 147 | |
| CDKN2A | F: CTCGTGCTGATGCTACTGAGGA  R: GGTCGGCGCAGTTGGGCTCC | 134 | |
| CCS | F: CAGAATGGAGGATGAGCAGCTG  R: GAGCGTGCAATGATGCCACAGG | 156 | |
| GLS | F: TGAGGCACTGTGCTCGGAAGTT  R: TCGAAGAGCTGAGACATCGCCA | | 113 |
| CTR1 | F: CCAGGACCAAATGGAACCATCC  R: ACCACCTGGATGATGTGCAGCA | | 107 |
| SCO2 | F: GACCACTCCATTGCCATCTACC  R: CTCAAGACAGGACACTGCGGAA | | 136 |
| COX17 | F: TTGCCCGGAGACCAAGAAGGC  R: ATTATTTATTCACACAGCAGACCAC | | 147 |
| MTF1 | F: GAGGCTTCACACAGGGAAAACG  R: GCTTTTCCACAGCCATCGTGATC | | 144 |
| DLD | F: GGGACTAGAAGAGCTGGGAATTG  R: CATCCTCTGCTTTGTGAGCCAG | | 140 |
| PDHA1 | F: GGATGGTGAACAGCAATCTTGCC  R: TCGCTGGAGTAGATGTGGTAGC | | 148 |
| PDHB | F: TGTAACTGTGGAAGGAGGCTGG  R: CATCAGCACCAGTGACACGAAC | | 122 |
| LIPT1 | F: CAGGAACAGCTTCTAAGATCGGC  R: AGCAGTGGCATTGCTCCTGATC | | 131 |
| LIAS | F: GCCAAGAAGGTTCAGCCTGATG  R: GTCTACATCTGCCTCACGAAGTG | | 114 |
| SDHB | F: GCAGTCCATAGAAGAGCGTGAG  R: TGTCTCCGTTCCACCAGTAGCT | | 101 |
| PPAT | F: GCGATTGAAGCACCTGTGGATG  R: CGGTTTTTACACAGCACCTCCAC | | 122 |
| ACO2 | F: CAATCGTCACCTCCTACAACAGG  R: GTCTCTGGGTTGAACTTGAGGG | | 133 |
| GCSH | F: GGCATTGGAACAGTGGGAATCAG  R: CACACTTTCCAAAGCACCAAACTC | | 126 |
| DBT | F: GCACCACTGATCTTACAGGAGG  R: CCAATGGCTACTTCAGGTGGCA | | 103 |
| DLST | F: AGATGAGGGCTCGGCACAAAGA  R: CCACCTCTTTGGTTGTGTCGTC | | 147 |
| CCL2 | F: AGAATCACCAGCAGCAAGTGTCC  R: TCCTGAACCCACTTCTGCTTGG | | 98 |
| GZMB | F: CGACAGTACCATTGAGTTGTGCG  R: TTCGTCCATAGGAGACAATGCCC | | 122 |
| TNFα | F: CTCTTCTGCCTGCTGCACTTTG  R: ATGGGCTACAGGCTTGTCACTC | | 135 |
| TGFβ | F: TACCTGAACCCGTGTTGCTCTC  R: GTTGCTGAGGTATCGCCAGGAA | | 122 |

**Table 2. Mouse RT-qPCR primers used for detection of the mRNA level**

| **Name** | **Sequence** | **Product**  **Size(bp)** |
| --- | --- | --- |
| Gpr162 | F: GCCAAGACATCCTTGCAGGTCA  R: ACCACAGCACTGCCAACACCAT | 148 |
| β-actin | F: CATTGCTGACAGGATGCAGAAGG  R: TGCTGGAAGGTGGACAGTGAGG | 138 |
| Slc25a3 | F: CAGCCTGGTTATGCCAACACCT  R: CTGTCTCATCCACAGAGGAGCA | 105 |
| Fasn | F: CACAGTGCTCAAAGGACATGCC  R: CACCAGGTGTAGTGCCTTCCTC | 130 |
| Scd1 | F: GCAAGCTCTACACCTGCCTCTT  R: CGTGCCTTGTAAGTTCTGTGGC | 106 |
| Dgat1 | F: GGTTCCGTGTTTGCTCTGGCAT  R: CCACTGACCTTCTTCCCTGTAG | 131 |
| Cpt1a | F: GGCATAAACGCAGAGCATTCCTG  R: CAGTGTCCATCCTCTGAGTAGC | 110 |
| Cpt1b | F: ATGTATCGCCGCAAACTGGACC  R: CTCTGAGAGGTGCTGTAGCAAG | 147 |
| Lipe | F: GCTCATCTCCTATGACCTACGG  R: TCCGTGGATGTGAACAACCAGG | 142 |
| Abhd5 | F: AGATGTGCCCTCAGGTTGGACA  R: ATCTGGTCGCTCAGGAAAACCC | 144 |
| Acc | F: GTTCTGTTGGACAACGCCTTCAC  R: GGAGTCACAGAAGCAGCCCATT | 120 |
| Lpl | F: GCGTAGCAGGAAGTCTGACCAA  R: AGCGTCATCAGGAGAAAGGCGA | 113 |
| Atp7b | F: ATCATCCCAGGACTGTCCGTTC  R: ATGTTGGCGGACCTGTGTCTCA | 125 |
| Cdkn2a | F: TGTTGAGGCTAGAGAGGATCTTG  R: CGAATCTGCACCGTAGTTGAGC | 114 |
| Gls | F: CAGAAGGCACAGACATGGTTGG  R: CAAGGTGGCAGCCATCACACTT | 98 |
| Ctr1 | F: CGCTACAATTCCATGCCTGTCC  R: GACTACCTGGATGATGTGCAGC | 129 |
| Sco2 | F: CCAGGACTACATTGTGGACCAC  R: GACACTGTGGAAGGCAGCTATG | 142 |
| Mtf1 | F: GGCTGTGAGAAGGCGTTCAACA  R: ATGTGCTTCCGCAGGTCACTGA | 134 |
| Dld | F: GGGTTGGCAAATCGGAAGAACAG  R: TCACCATGCCATCTGTGTCAGC | 117 |
| Pdha1 | F: GTGAGAACAACCGCTATGGCATG  R: CGCAAACTTTGTTGCCTCTCGG | 143 |
| Pdhb | F: CATCTCGTGACTGTGGAAGGAG  R: ACATCAGCACCAGTGACACGCA | 128 |
| Lipt1 | F: CTTCTTCGCTGAAGAGCCCGTA  R: CTTCACAGGTCAGCGTGGAATC | 108 |
| Lias | F: CACATCGCCAAGACCGTGTCAT  R: AGACAGAGCCACCTTCTCCACT | 114 |
| Sdhb | F: TGCGGACCTATGGTGTTGGATG  R: CCAGAGTATTGCCTCCGTTGATG | 133 |
| Ppat | F: GGAAACCTGCTTCAGCCTCCAA  R: ATGCTCCCAAGTTCTTCAGCCG | 127 |
| Aco2 | F: ACTGTGGCAGAGAAGGAAGGCT  R: CAATGCCTGCTTAGCCACAGCT | 117 |
| Gcsh | F: GGTATTGGAACGGTGGGAATCAG  R: CAGCCTTCACACTCTCCAAAGC | 133 |
| Dbt | F: TCAATGCCTCCGTGGACGAGAA  R: GGCGATCTCAAATACAGAGCGG | 140 |
| Dlst | F: AGGTCTGCGTTCAGAACATCGG  R: AGGAAAGCATCCTTGTGCCGAG | 162 |
| Ccl2 | F: GCTACAAGAGGATCACCAGCAG  R: GTCTGGACCCATTCCTTCTTGG | 106 |
| Gzmb | F: CAGGAGAAGACCCAGCAAGTCA  R: CTCACAGCTCTAGTCCTCTTGG | 131 |
| Tnfα | F: GGTGCCTATGTCTCAGCCTCTT  R: GCCATAGAACTGATGAGAGGGAG | 139 |
| Tgfβ | F: TGATACGCCTGAGTGGCTGTCT  R: CACAAGAGCAGTGAGCGCTGAA | 107 |

**Table 3. Plasmid construction primers**

| **Name** | **Sequence** | **Product**  **Size(bp)** |
| --- | --- | --- |
| GPR162-sh#1 | F:CTGTCCCATGATGAGACAAAC | 21 |
| R: GTTTGTCTCATCATGGGACAG | 21 |
| GPR162-sh#2 | F:TATGACTGGAACGAGAGTATC | 21 |
| R: GATACTCTCGTTCCAGTCATA | 21 |
| GPR162-OE | F:CCGGAATTCATGCTGAGCACTGGGGTGGT | 915 |
| R GGACTAGTTCACAGGGTCAGCTGGGGAA |
| GPR162-sg#1 | F: CACCGACTCTCGTTCCAGTCATAGT | 25 |
| R: AAACACTATGACTGGAACGAGAGTC | 25 |
| GPR162-sg#2 | F: CACCGAAGCGGCGGTCCTCGCTGGA | 25 |
| R: AAACTCCAGCGAGGACCGCCGCTTC | 25 |

**Table 4. Antibody**

| **Antibodies** | **Source** | **Identifier** |
| --- | --- | --- |
| Anti-β-actin antibody | Sigma | Cat. A5441 |
| Anti-GPR162 antibody | Proteintech | Cat. 15254-1-AP |
| Anti-GPR162 antibody | Invitrogen | Cat. PA5-84236 |
| Anti-GPR162 antibody | Santa cruz | Cat. sc-138323 |
| Anti-SLC25A3 antibody | Abclonal | Cat. 10420-1-AP |
| Anti-SLC25A3 antibody | Abnova | Cat.H00005250-B02P |
| Anti-CD36 antibody | Proteintech | Cat. 66395-1-Ig |
| Anti-VDAC antibody | Proteintech | Cat. 66345-1-Ig |
| Anti-GAPDH antibody | Abiowell | Cat. AWA80012 |
| Anti-FLAG antibody | Sigma | Cat. MA1-91878 |
| Anti-TOMM20 antibody | abcam | Cat. ab186735 |
| Anti-Lipoic acid antibody | abcam | Cat. ab5872S |
| Anti-LIAS antibody | Proteintech | Cat. 11577-1-AP |
| Anti-DLAT antibody | CST | Cat. 12362S |
| Anti-ADXantibody | abcam | Cat. ab108257 |
| Anti-PerCP/Cyanine5.5 Anti-Mouse CD49b antibody | BD Pharmingen | Cat. 103519 |
| Anti-FITC Rat Anti-Mouse CD4(RM4-5) antibody | BD Pharmingen | Cat. 553046 |
| Anti-APC-Cy7 Rat Anti-Mouse CD45(30-F11) antibody | BD Pharmingen | Cat. 557659 |
| Anti-BB515 Rat Anti-Mouse I-A/I-E(2G9) antibody | BD Pharmingen | Cat. 565254 |
| Anti-Alexa Fluor 647 Rat Anti-Mouse CD206(MR5D3) antibody | BD Pharmingen | Cat. 565250 |
| Anti-Ms CD3e APC 145-2C11 antibody | BD Pharmingen | Cat. 553066 |
| Anti-PerCP-Cy5.5 Rat Anti-Mouse Ly-6G(1A8) antibody | BD Pharmingen | Cat. 560602 |
| Anti-PE-CF594 Rat Anti-Mouse F4/80(T45-2342) antibody | BD Pharmingen | Cat. 565613 |
| Anti-PE-Cy7 Rat Anti-CD11b(M1/70) antibody | BD Pharmingen | Cat. 552850 |
| Anti-Ms CD86 PE GL1 antibody | BD Pharmingen | Cat. 553692 |
| Anti-Ms CD11c APC HL3 antibody | BD Pharmingen | Cat. 550261 |
| Goat anti-mouse IgG-HRP | Santa Cruz | Cat. sc-2005 |
| Goat anti-rabbit IgG-HRP | Santa Cruz | Cat. sc-2004 |
